# Supplementary material for: Hydroxytyrosol-Fortified Foods Obtained by Supercritical Fluid Extraction of Olive Oil
Source: MDPI journal article supplement (doi:10.3390/antiox10101619), 2021-10-14
Supplement: s1 [file s1]

# Hydroxytyrosol enriched-foods obtained by supercritical fluid extraction of olive oil

## Supplementary material

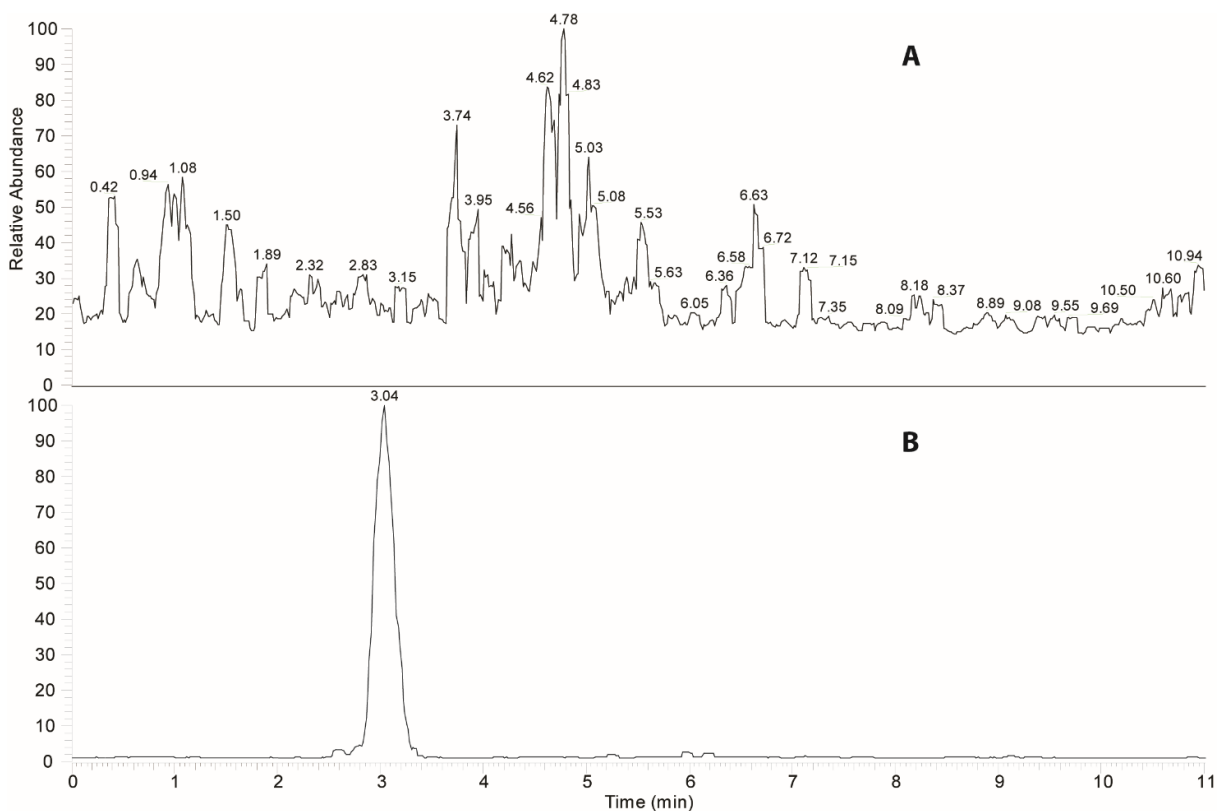

**Figure S1.** Multiple reaction monitoring chromatograms performed on the exhausted olive oil: (A) transition relative to hydroxytyrosol, (B) transition relative to *d*<sub>2</sub>-hydroxytyrosol (internal standard)

**Table S1.** Total amount of hydroxytyrosol found in “enriched bread roll”

|                                                     |       |
|-----------------------------------------------------|-------|
| <b>Amount of hydroxytyrosol in enriched flour</b>   |       |
| (µg)                                                | 69.20 |
| <b>Amount of hydroxytyrosol in bread rind (µg)</b>  | 16.61 |
| <b>Amount of hydroxytyrosol in bread crumb (µg)</b> | 49.31 |
